# Supplementary material
Source: MDPI journal article supplement (https://www.mdpi.com/2073-445X/11/11/2078)
Supplement: s1 [file s1]

## Supplementary Materials

**Figure S1.** The rainfall hyetograph and runoff hydrograph of the storm event on 16 December 2021 were used for validating the catchment time of concentration and catchment runoff coefficient.

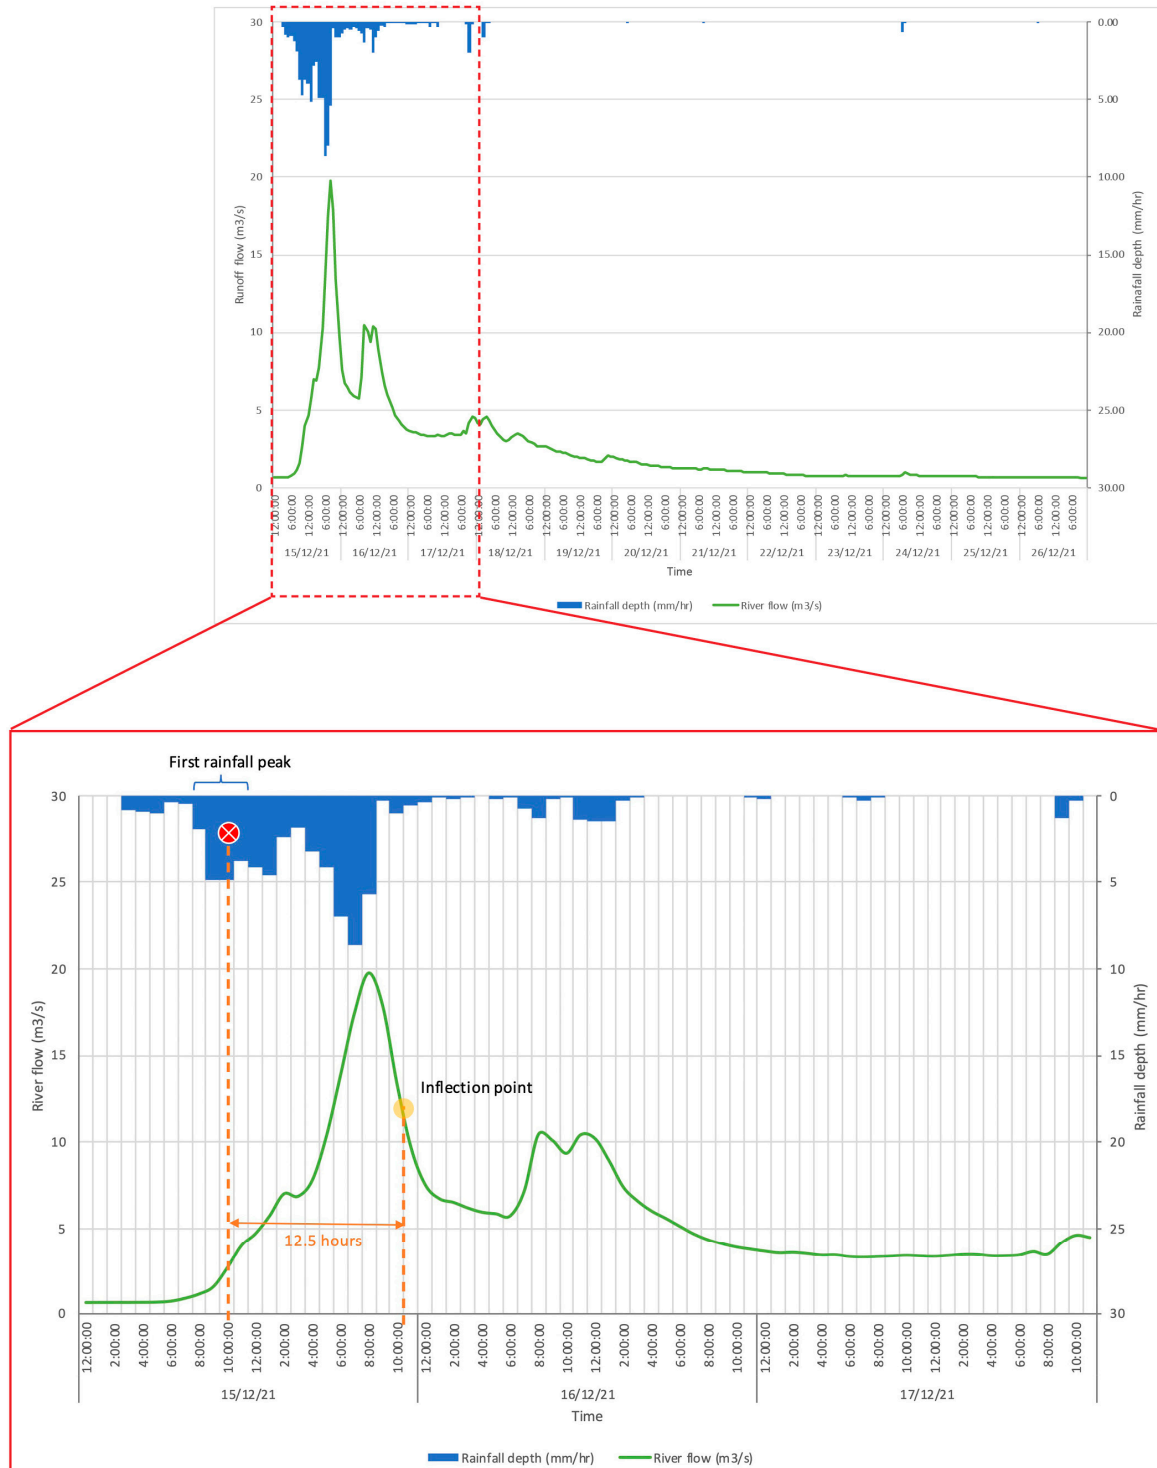

**Table S1.** The comparison between modelled and volumetric runoff coefficients of the monitoring station's drainage area.

|                               | $C_5$ | $C_{50}$                  |
|-------------------------------|-------|---------------------------|
| Modelled runoff coefficient   | -     | 0.48                      |
| Volumetric runoff coefficient | 0.27  | $0.27 \times 1.68 = 0.46$ |

**Table S2.** The average ratio between the runoff coefficient of a 50-year storm to a 5-year storm for the monitoring station's drainage area.

| Land covers                    | Areas (km <sup>2</sup> ) | Percentages of drainage area | $C_{50}/C_5$ | Source                                                                                                                                                                                                                                                                              |
|--------------------------------|--------------------------|------------------------------|--------------|-------------------------------------------------------------------------------------------------------------------------------------------------------------------------------------------------------------------------------------------------------------------------------------|
| Business areas                 | 15.51                    | 20.1%                        | 1.12         | Christchurch City Council (2020)<br><a href="https://ccc.govt.nz/assets/Documents/Environment/Water/waterways-guide/21.RainfallAndRunoff.pdf">https://ccc.govt.nz/assets/Documents/Environment/Water/waterways-guide/21.RainfallAndRunoff.pdf</a><br>(accessed on 28 November 2021) |
| Low-density residential areas  | 0.08                     | 0.1%                         | 1.2          |                                                                                                                                                                                                                                                                                     |
| High-density residential areas | 15.56                    | 20.1%                        | 1.2          |                                                                                                                                                                                                                                                                                     |
| Hilly residential areas        | 3.14                     | 4.1%                         | 1.07         | Froehlich (2016)<br><a href="https://ascelibrary.org/doi/abs/10.1061/%28ASCE%29IR.1943-4774.0001054">https://ascelibrary.org/doi/abs/10.1061/%28ASCE%29IR.1943-4774.0001054</a><br>(accessed on 28 November 2021)                                                                   |
| Undeveloped areas              | 42.76                    | 55.3%                        | 2.1          | n/a                                                                                                                                                                                                                                                                                 |
| Water                          | 0.23                     | 0.3%                         | 1            |                                                                                                                                                                                                                                                                                     |
| <b>Average</b>                 |                          |                              | <b>1.68</b>  |                                                                                                                                                                                                                                                                                     |
